# Supplementary material for: Suppression of Physaria fendleri SDP1 Increased Seed Oil and Hydroxy Fatty Acid Content While Maintaining Oil Biosynthesis Through Triacylglycerol Remodeling
Source: Frontiers journal article supplement (doi:10.3389/fpls.2022.931310), 2022-06-03
Supplement: Data_Sheet_1.PDF [file Data_Sheet_1.PDF]

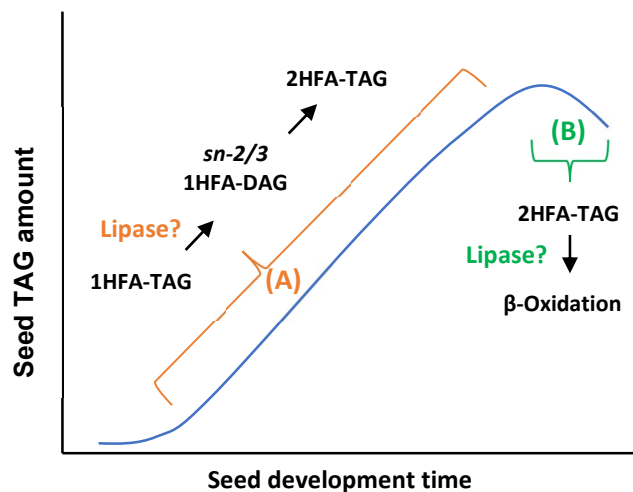

### Supplemental Figure S1. Possible roles of lipases in *P. fendleri* oil accumulation.

In many oilseeds TAG accumulates over seed development, then TAG levels drop ~10-20% during seed maturation (blue line). (A) In *P. fendleri* recent results suggest an uncharacterized lipase is involved in remodeling 1HFA-TAG to 2HFA-TAG during TAG biosynthesis (Bhandari and Bates, 2021). (B) The reduction in oil content during seed maturation in several species has been demonstrated to be mostly due to the TAG lipase SDP1. However, considering the dual roles for a lipase in *P. fendleri* TAG biosynthesis and TAG turnover during seed development the possible role of PfeSDP1 in either or both processes is unclear. DAG, Diacylglycerol; HFA, Hydroxy Fatty Acid; TAG, Triacylglycerol.

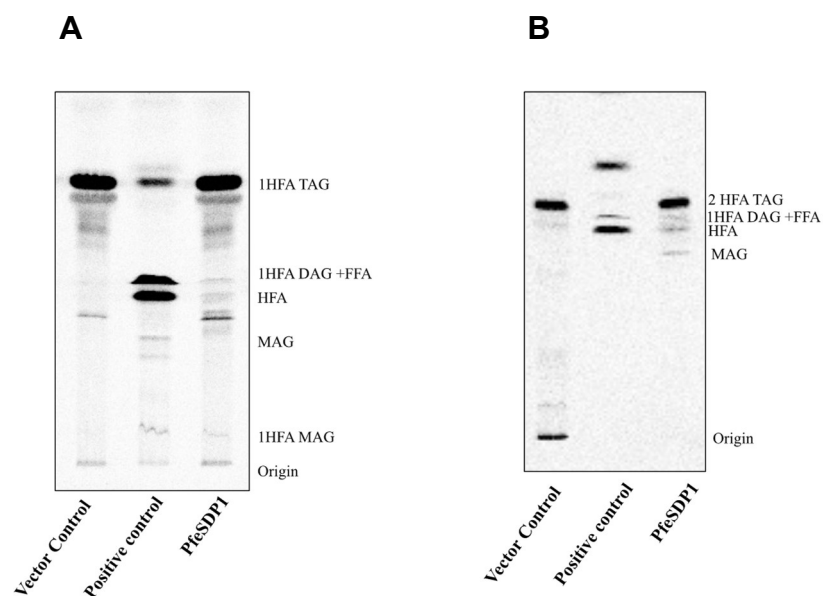

**Supplementary Figure S2. In vitro lipase assay with [ $^{14}\text{C}$ ]1HFA-TAG and [ $^{14}\text{C}$ ]2HFA-TAG substrates.** Phosphor image TLC of lipids extracted from *in vitro* lipase assay reactions with [ $^{14}\text{C}$ ]1HFA-TAG (**A**) and [ $^{14}\text{C}$ ]2HFA-TAG (**B**) as substrates. Lipase from *Rhizopus mehei* was used as positive control. Elution fraction from vector control (VC), was used as negative controls. 1HFA-TAG and 2HFA-TAG represents one and two hydroxy fatty acid containing triacylglycerols, respectively; 1HFA-DAG, one hydroxy fatty acid containing diacylglycerol; 1HFA-MAG, one hydroxy fatty acid containing monoacylglycerol; HFA, hydroxy fatty acid, FFA, free fatty acid; MAG, Monoacylglycerol.

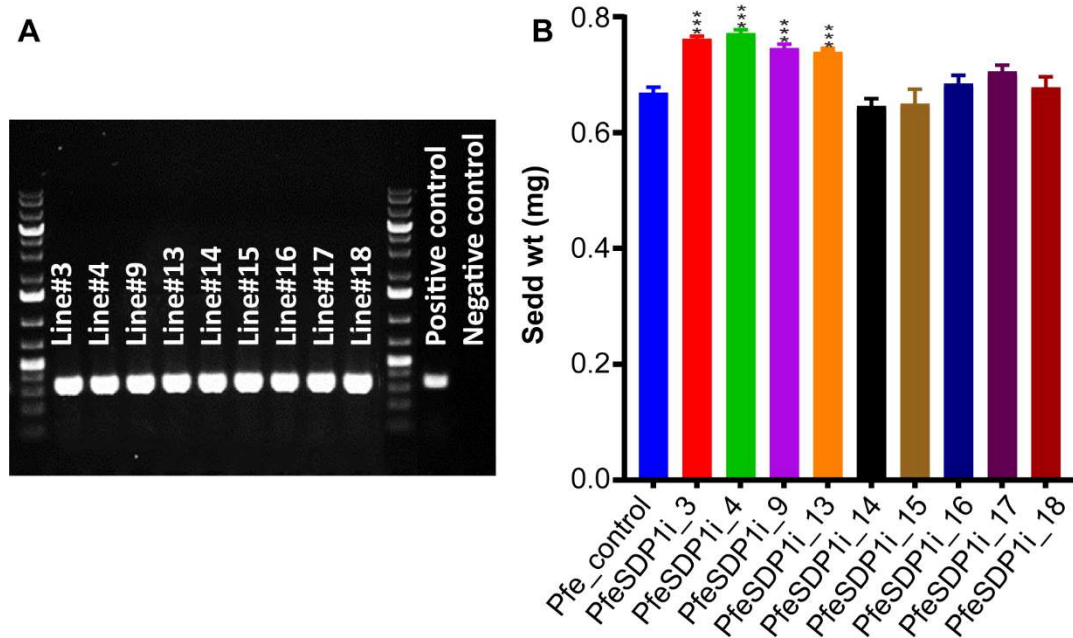

**Figure S3. Transgenic PfeSDP1\_RNAi line screening.** (A) Transgenic PfeSDP1\_RNAi plants were confirmed by PCR using 2S promoter and gene-specific primers, pB9-PfeSDP1 plasmid used as positive and DNA extraction buffer used as negative control. (B) Seed weight of T1 selfed plants (T2 seed) represents average seed weight (n=15). Asterisks (\*\*\*) indicate significant differences at  $P \leq 0.0005$  to the control by two-tailed paired *t*-tests.

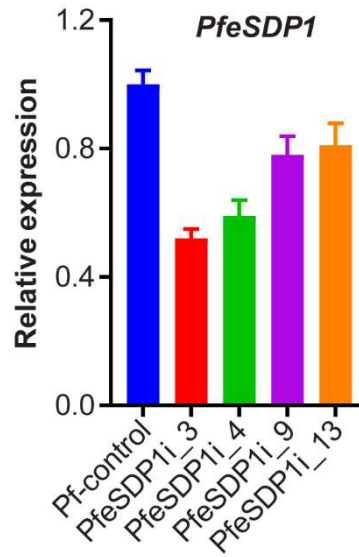

**Supplementary Figure S4. Relative expression of the *PfeSDP1* gene in PfeSDP1\_RNAi lines.**

Relative expression of the *PfeSDP1* gene in PfeSDP1\_RNAi lines in T2 germinated seeds compared to the *P. fendleri* control germinated seeds. The gene expression was quantified by qRT-PCR and normalized to the reference *18S* gene. The expression values are the average of three biological replicates  $\pm$  SE.

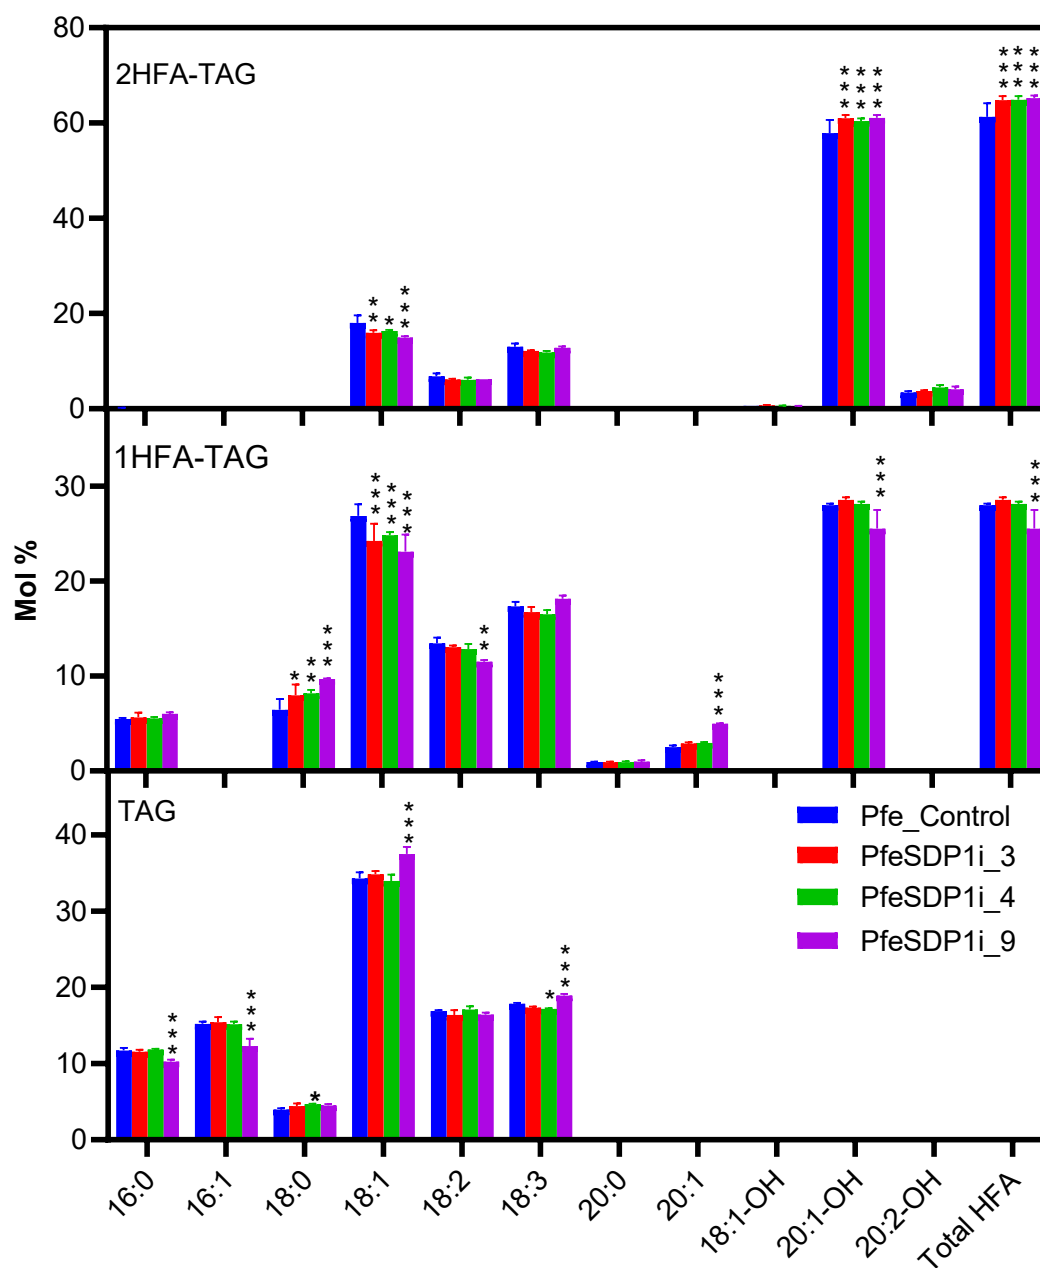

**Supplementary Figure S5. Fatty acid profiles of different TAG molecular species in the seeds of PfeSDP1 knockdown lines.** Fatty acid composition of TAG, 1HFA-TAG and 2HFA-TAG were represented as Mol % of total fatty acids. Values represent mean  $\pm$  SD of three independent plants from each line. Significant difference between wild type control and PfeSDP1 knockdown lines was determined using two-way ANOVA (\*\* $P \leq 0.001$ , \*\* $P \leq 0.002$ , \* $P \leq 0.033$ ).

**Supplementary Table S1. List of primers used in this study**

| <b>Primer name</b>    | <b>Sequence (5'-3')</b>               | <b>Purpose</b> |
|-----------------------|---------------------------------------|----------------|
| PfeSDP1-FW            | ATATGGTACCCATGGATATAAGTAATGAGGCCAGT   | Yeast Cloning  |
| PfeSDP1-RV            | ATATGCGGCCGCTCACTGAACAGAACTGGTTCTT    | Yeast Cloning  |
| <i>PfeSDP1</i> -RNAiF | TACTACCGCGCGGCCGCAATGGCTTACCGGAGGAAGT | RNAi           |
| <i>PfeSDP1</i> -RNAiR | GACTTCTGCAGCCCGGGAAGTGAGCCCTCTTGACGAC | RNAi           |
| 2SProm-SeqFor2        | CTTACACGTGATTGCCATGCAAATC             | Squencing      |
| F2I-5SEQR             | CGAAAATGAGAAGAAATGGAAGAGAAGC          | Squencing      |
| F2I-3SEQF             | CCATAGTCTTGAGTTTTTCAGCTTGTTG          | Squencing      |
| GlycininTerm-SeqR2    | CAGTGAACAAAAGGCAAGCTAAAGCC            | Squencing      |
| <i>Pfe18S</i> _F      | GAGAAACGGCTACCATCCA                   | qRT-PCR        |
| <i>Pfe18S</i> _R      | CCGTGTCAGGATTGGGTAATT                 | qRT-PCR        |

**Supplementary Table S2. Species abbreviations and accession numbers used in phylogenetic study of SDP1 proteins.**

| <b>Accession</b>      | <b>Species</b>              | <b>Abbreviation</b> |
|-----------------------|-----------------------------|---------------------|
| <i>This study</i>     | <i>Physaria fendleri</i>    | PfeSDP1             |
| <i>NP_001332745.1</i> | <i>Arabidopsis thaliana</i> | AtSDP1              |
| <i>XP_010452294.1</i> | <i>Camelina sativa</i>      | CsaSDP1             |
| <i>XP_013668385.1</i> | <i>Brassica napus</i>       | BnaSDP1             |
| <i>XP_009122642.1</i> | <i>Brassica rapa</i>        | BraSDP1             |
| <i>XP_018446336.1</i> | <i>Raphanus sativus</i>     | RsSDP1              |
| <i>EEF32280.1</i>     | <i>Ricinus communis</i> ]   | RcSDP1              |
| <i>XP_015898084.1</i> | <i>Ziziphus jujuba</i>      | ZjSDP1              |
| <i>XP_007203312.1</i> | <i>Prunus persica</i>       | PpSDP1              |
| <i>XP_002308909.1</i> | <i>Populus trichocarpa</i>  | PtSDP1              |
| <i>XP_012085968.1</i> | <i>Jatropha curcas</i>      | JcSDP1              |
| <i>RVW92138.1</i>     | <i>Vitis vinifera</i>       | VviSDP1             |
| <i>XP_039163397.1</i> | <i>Eucalyptus grandis</i>   | EgrSDP1             |

**Supplementary Table S3. Fatty acid compositions ( $\mu\text{g}$  per mg seed) of *P. fendleri* expressing SDP1\_RNAi**

|                    | 16:0           | 18:0           | 18:1            | 18:2            | 18:3            | 20:0           | 20:1           | 18:1-OH        | 18:2-OH        | 20:1-OH          | 20:2-OH         |
|--------------------|----------------|----------------|-----------------|-----------------|-----------------|----------------|----------------|----------------|----------------|------------------|-----------------|
| <b>Pfe_control</b> | 4.8 $\pm$ 0.11 | 4.4 $\pm$ 0.11 | 38.3 $\pm$ 0.95 | 18.1 $\pm$ 0.18 | 30.4 $\pm$ 0.61 | 0.5 $\pm$ 0.02 | 1.2 $\pm$ 0.04 | 0.4 $\pm$ 0.02 | 0.6 $\pm$ 0.01 | 122.2 $\pm$ 2.88 | 7.0 $\pm$ 0.31  |
| <b>PfeSDP1i_3</b>  | 4.8 $\pm$ 0.05 | 4.4 $\pm$ 0.19 | 44.2 $\pm$ 0.85 | 19.8 $\pm$ 0.45 | 31.6 $\pm$ 1.27 | 0.4 $\pm$ 0.01 | 1.5 $\pm$ 0.03 | 0.3 $\pm$ 0.01 | 0.7 $\pm$ 0.02 | 144.8 $\pm$ 2.08 | 8.9 $\pm$ 0.44  |
| <b>PfeSDP1i_4</b>  | 4.8 $\pm$ 0.22 | 4.5 $\pm$ 0.15 | 44.3 $\pm$ 0.98 | 19.6 $\pm$ 0.40 | 33.7 $\pm$ 0.28 | 0.4 $\pm$ 0.02 | 1.5 $\pm$ 0.04 | 0.3 $\pm$ 0.03 | 0.5 $\pm$ 0.02 | 149.8 $\pm$ 1.90 | 10.6 $\pm$ 0.53 |
| <b>PfeSDP1i_9</b>  | 4.2 $\pm$ 0.14 | 4.1 $\pm$ 0.15 | 41.6 $\pm$ 0.78 | 19.6 $\pm$ 0.36 | 35.9 $\pm$ 0.76 | 0.3 $\pm$ 0.01 | 1.8 $\pm$ 0.06 | 0.2 $\pm$ 0.03 | 0.3 $\pm$ 0.01 | 153.6 $\pm$ 1.42 | 9.8 $\pm$ 0.13  |
| <b>PfeSDP1i_13</b> | 4.0 $\pm$ 0.14 | 3.8 $\pm$ 0.12 | 39.1 $\pm$ 0.98 | 18.2 $\pm$ 0.29 | 34.8 $\pm$ 0.75 | 0.3 $\pm$ 0.01 | 1.6 $\pm$ 0.05 | 0.2 $\pm$ 0.02 | 0.4 $\pm$ 0.01 | 155.0 $\pm$ 0.90 | 10.8 $\pm$ 0.18 |



**Supplementary Table: S4. Fatty acid compositions (weight percent of total FAs) of *P. fendleri* expressing SDP1\_RNAi**

| <b>Pfe_control</b> | <b>16:0</b> | <b>18:0</b> | <b>18:1</b> | <b>18:2</b> | <b>18:3</b> | <b>20:0</b> | <b>20:1</b> | <b>18:1-OH</b> | <b>18:2-OH</b> | <b>20:1-OH</b> | <b>20:2-OH</b> |
|--------------------|-------------|-------------|-------------|-------------|-------------|-------------|-------------|----------------|----------------|----------------|----------------|
| <b>Pfe_control</b> | 2.1±0.12    | 2.0±0.11    | 16.8±0.20   | 8.0±0.20    | 13.3±0.13   | 0.2±0.01    | 0.6±0.01    | 0.2±0.01       | 0.3±0.01       | 53.5±0.37      | 3.1±0.12       |
| <b>PfeSDP1i_3</b>  | 1.9±0.06    | 1.7±0.13    | 17.8±0.48   | 7.5±0.28    | 12.3±0.40   | 0.2±0.01    | 0.6±0.01    | 0.1±0.01       | 0.3±0.01       | 55.0±0.32      | 2.7±0.15       |
| <b>PfeSDP1i_4</b>  | 1.8±0.11    | 1.7±0.07    | 16.4±0.49   | 7.3±0.17    | 12.5±0.10   | 0.2±0.01    | 0.6±0.01    | 0.1±0.01       | 0.2±0.01       | 55.4±0.45      | 3.9±0.18       |
| <b>PfeSDP1i_9</b>  | 1.5±0.05    | 1.5±0.05    | 15.3±0.16   | 7.2±0.07    | 13.2±0.17   | 0.1±0.00    | 0.7±0.02    | 0.1±0.01       | 0.1±0.00       | 56.5±0.08      | 3.6±0.01       |
| <b>PfeSDP1i_13</b> | 1.5±0.06    | 1.4±0.04    | 14.5±0.25   | 6.8±0.09    | 13.0±0.23   | 0.1±0.00    | 0.6±0.02    | 0.1±0.01       | 0.1±0.00       | 57.7±0.25      | 4.1±0.08       |
